# Supplementary material
Source: Copernicus journal article supplement (doi:10.5194/egusphere-2025-6500)
Supplement: Supplementary file [file egusphere-2025-6500-AC2-supplement.pdf]

# Reply to Reviewer 2's comments

Manuscript: CaMa-Flood-GPU (egusphere-2025-6500)

## Legend

- Reviewers' comments
- Authors' responses
- Unchanged context from the manuscript
- New or changed text in the revised manuscript

I enjoyed reading manuscript egusphere-2025-6500, which describes the GPU implementation of CaMa-Flood, a popular river routing model typically used in large scale studies—often in concomitance with global hydrologic models. Overall the manuscript is well organized and written, although I believe there are opportunities for improving both quality of the presentation and experimental setup.

**To reviewer:** We thank the reviewer for the careful reading and constructive suggestions. We have revised the manuscript along the main directions identified in the review. The Introduction now gives more background for both GPU hydrodynamic modelling and CaMa-Flood itself, including a clearer explanation of local inertial routing, sub-grid inundation and CaMa-Flood's adoption as a routing layer. Section 3.1 now starts with an explicit experimental-setup paragraph, separating the  $1^\circ$  binary forcing used for speed benchmarks from the  $0.1^\circ$  ERA5-Land NetCDF runoff used for numerical stability. Section 3.2 has been expanded by retaining the bifurcation-enabled stability comparison, adding the unified 1980-2014 comparison period, and adding discharge comparisons across rivers of different scales. Finally, the Conclusions now discuss how the modular sub-module interface can support reservoir operation, sediment transport and differentiable global routing. We appreciate that the reviewer's suggestions helped us improve both the context and the experimental transparency of the manuscript. The specific manuscript changes and their locations are identified in the itemized responses below.

**Comment 1.** Beginning with the Introduction, I think it would be important to provide more context on the implementation of hydrodynamic models in GPU—something that is now limited to just a few lines. In other words, what is the state-of-the-art in the field?

**To reviewer:** Thank you for the suggestion. We agree that the submitted Introduction under-represented the state of the art in GPU hydrodynamic modelling and therefore did not clearly show where CaMa-Flood-GPU fits. In the revision, we expanded the discussion from a short citation list into a structured paragraph. The new text distinguishes GPU implementations of full 2-D shallow-water models, GPU ports of simplified local-inertial or kinematic flood models, and GPU acceleration in integrated hydrology or routing workflows.

This broader framing also helps define the specific gap addressed by this work. Many existing GPU hydrodynamic models target regular or quasi-regular meshes and are often applied at urban, regional or continental scales. CaMa-Flood-GPU instead targets the global CaMa-Flood unit-catchment

network, where the graph is irregular, bifurcations must be represented and the calculation must run across multiple GPUs. We therefore revised the Introduction to make the contribution less isolated and more clearly connected to the state of the art. The manuscript change is shown below for the Introduction, replacing the short GPU-hydrodynamic-model context paragraph.

**Revised manuscript text:**

GPUs have become a cornerstone of scientific computing because of their massive parallelism, and they have been successfully applied to hydrodynamic models in recent years. GPU acceleration is increasingly being adopted across Earth-system model components, from atmospheric chemistry kernels in coupled climate-chemistry models (Alvanos & Christoudias, 2017) to flood hydrodynamics. In the latter, GPU-based modelling has matured along three complementary directions. (i) For the full 2-D shallow-water equations, multi-GPU and single-GPU codes deliver order-of-magnitude speed-ups for high-resolution flood-inundation studies on regular meshes (Morales-Hernández et al., 2021). (ii) For simplified local inertial or kinematic formulations, GPU ports of established CPU floodplain models extend GPU acceleration from urban catchments to continental flood mapping while retaining sub-grid topographic detail (Sharifian et al., 2023; Rong et al., 2024; Caviedes-Voullieme et al., 2023). (iii) For integrated land-surface and routing, GPU acceleration of hydrology models (Hokkanen et al., 2021) and GPU-resident machine-learning surrogates of routing (Zahura et al., 2020) demonstrate that the throughput unlocked by GPUs makes ensemble and global-domain experiments tractable. Most of the above target single-GPU execution on regular or quasi-regular meshes at sub-continental scale. Global river-routing on irregular unit-catchment networks, the regime in which CaMa-Flood operates and which is mandatory for properly representing bifurcations, deltas and floodplain storage on a global mesh, has so far not been ported to GPU. CaMa-Flood-GPU is, to our knowledge, the first multi-GPU implementation of a global, irregular, bifurcation-aware routing model.

**Comment 2.** A second point I suggest strengthening is the background information on CaMa-Flood; I found it hard to follow the first part of the Introduction, as it assumes the reader is familiar with the model.

**To reviewer:** Thank you. We agree that the submitted Introduction was too compressed for readers unfamiliar with CaMa-Flood. Because many of the GPU implementation choices only make sense after the reader understands the CaMa-Flood formulation, we inserted a background paragraph before the GPU motivation. The added paragraph explains the CMF discretisation into irregular unit-catchments, the storage partition between channel and floodplain, and the diagnosis of water depth and inundation from sub-grid topography.

We also use this paragraph to connect the physical model to the computational challenges discussed later. The local inertial momentum equation explains why downstream water level and backwater effects matter, while the bifurcation extension explains why a simple single-downstream tree is not sufficient. This gives readers the context needed to understand the subsequent discussion of irregular topology, scatter\_add/atomic\_add accumulation and basin-group domain decomposition. The manuscript change is shown below for the Introduction, inserted before the paragraph that motivates GPU implementation.

**Revised manuscript text:**

CaMa-Flood employs an explicit time integration of this equation, where the new outflow is computed based on the water level difference ( $h_c - h_d$ ) between adjacent catchments. CaMa-Flood is an instance of the catchment-based macro-scale floodplain (CMF) approach (Yamazaki et al., 2011; Yamazaki, 2025), which discretises every river basin into irregular unit-catchments of roughly 5-50 km extracted from MERIT Hydro (Yamazaki et al., 2019) rather than from a regular grid. Within each unit-catchment, water mass is partitioned into a channel storage and a floodplain storage, exchanged according to the channel bank-full geometry. Two simplifying assumptions are imposed: no significant topographic depressions inside a unit-catchment, and a spatially uniform water surface across its floodplain. Under these, sub-grid topographic profiles, precomputed as the cumulative distribution of high-resolution DEM elevations, diagnose water depth and inundation extent directly from total storage, so no 2-D shallow-water solve is needed between neighbouring unit-catchments. Channel routing along the river network follows the local inertial momentum equation (Bates et al., 2010; de Almeida et al., 2012), with the outlet pixel of each unit-catchment supplying an absolute reference elevation so that water-surface gradients, and therefore backwater and flow reversal, can be represented even between coarse-resolution units. Recent extensions remove the single downstream flow path constraint and represent channel bifurcations as additional divergent flows driven by the same local inertial equation (Yamazaki et al., 2014; Mateo et al., 2017).

**Comment 3.** The “Performance comparison” (Section 3.1) seems strong. In my opinion, it should be complemented by a section / sub-section on the experimental setup, where the authors explain how the runoff data were generated and was CaMa-Flood setup.

**To reviewer:** Thank you for the suggestion. We agree that the performance results were difficult to interpret without a compact experimental setup. In the revision, a new experimental-setup paragraph at the start of Section 3.1 specifies the river-network resolutions, benchmark period, active model options, CPU and GPU configurations, repetition count and forcing sources before the wall-clock results. This makes the comparison reproducible and separates model-performance choices from later numerical-stability choices.

We also clarified the forcing distinction, because it is important for interpreting Table 3. The speed benchmark uses the 1 ° binary sample runoff distributed with the CPU CaMa-Flood release, which keeps the wall-time comparison focused on routing and GPU execution rather than forcing-format overhead. The numerical-stability comparison adds a 0.1 ° ERA5-Land NetCDF runoff forcing case, so that the GPU and CPU outputs are compared under the same high-resolution forcing and parameter states in that separate analysis. The manuscript change is shown below as a new experimental-setup paragraph at the start of Section 3.1.

**Revised manuscript text:**

To make the subsequent performance and numerical-stability analyses reproducible, we first summarize the common experimental setup and then distinguish the choices specific to the wall-clock benchmark and to the stability comparison. All performance benchmarks use CaMa-Flood global parameter sets derived from MERIT Hydro (Yamazaki et al., 2019) at four spatial resolutions, 15-, 6-, 3- and 1-arcmin; the corresponding numbers of unit-catchments, bifurcation links and approximate adaptive sub-steps are listed in Table 2. The same model options are enabled in both implementations: adaptive sub-step integration, bifurcation routing and on-the-fly logging of the selected diagnostic output. The hardware configurations used in the benchmarks are summarized in Table 1.

For the speed benchmark, the runoff forcing is the daily  $1^\circ$  binary sample runoff distributed with the CPU CaMa-Flood release; the sample forcing includes year 2000 and was prepared from the output of the Ensemble Land State Estimator (ELSE) (Kim et al., 2009) and is included in the CPU release. The CPU reference is CaMa-Flood v4.23 compiled with Intel Fortran using “-O3 -fp-model precise” and run in hybrid MPI/OpenMP mode; we tested several MPI/OpenMP combinations and used the fastest configuration for each CPU benchmark, with 16 MPI ranks following the official CaMa-Flood recommendation on the multi-core hosts. GPU runs use a Triton block size of 128, which specifies the number of unit-catchments processed by one kernel instance. All reported wall-times are means over five repeated runs. Table 3 summarizes the benchmark timing results for a 1-year simulation period at the four resolutions on various hardware configurations: a personal workstation with NVIDIA RTX 4070 Ti, the V100 server with 1–4 GPUs, the A100 server with 1–4 GPUs, and the CPU-only server (four CPU nodes) with different numbers of CPU cores.

For the numerical-stability comparison, we use daily forcing series prepared from  $0.1^\circ$  ERA5-Land NetCDF runoff (Muñoz-Sabater et al., 2021) and from the earthH2Observe (E2O) Tier-1 ensemble runoff (Schellekens et al., 2017). The 1980-2014 period is adopted to remain consistent with the temporal coverage of the E2O Tier-1 dataset. For each numerical-stability comparison, CPU and GPU runs use the same 6-arcmin parameter set, identical forcing, initial states and adaptive sub-step settings, with the bifurcation module enabled in both runs.

**Comment 4.** A similar comment applies to “Numerical stability” (Section 3.3), which is rather short. Here, there are multiple opportunities for deepening the analysis and demonstrating that the model is indeed stable. For example, you could consider the option of working with runoff data at multiple spatial resolutions (why was a resolution 0.25 degrees adopted?) and using a variety of gauging stations. The current analysis focuses only on three major rivers; how does the two model implementations perform on smaller rivers? How about bifurcation points?

**To reviewer:** Thank you for these suggestions. We agree that the submitted numerical-stability section was too short and did not explain why the selected setup was informative. In the revision, we focus the main figure on the bifurcation-enabled case because it includes the base routing operations and additionally exercises bifurcation fluxes and atomic accumulation. This avoids duplicating a simpler no-bifurcation figure while still testing the numerically most demanding route through the implementation.

We also explain the forcing choice and broaden the stability evidence. The revised analysis adds a  $0.1^\circ$  ERA5-Land runoff comparison because this long, globally available, high-resolution forcing source makes a multi-decadal CPU-GPU comparison possible while exercising NetCDF input, forcing-to-unit-catchment interpolation and the routing kernels together. To address the concern about representativeness, we unified the stability period to 1980-2014 and added discharge comparisons for rivers of different scales, rather than only the three major rivers. The manuscript change is shown below for Section 3.2, replacing the previous short numerical-stability description.

**Revised manuscript text:**

The numerical-stability comparison follows the setup described in Section 3.1 and covers 1980–2014 with two daily runoff forcing series: E2O Tier-1 ensemble runoff at  $0.25^\circ$  and a daily series prepared from ERA5-Land surface runoff at  $0.1^\circ$ . Using these two forcing datasets, we compare CaMa-Flood-GPU with the reference CPU implementation through spatial mean fields and station

hydrographs, and assess whether floating-point differences remain bounded over the multi-decadal simulation.

Figure 8 presents the CPU–GPU comparison under E2O runoff. The CPU and GPU mean river-outflow fields (Figure 8a, b) are visually indistinguishable, and the relative-difference map in Figure 8c is dominated by the gray “below-noise-floor” band of  $\pm 0.001\%$ , with non-zero values appearing mainly on the largest river stems. Figure 8d–f repeats the comparison for floodplain outflow and Figure 8g–i for river depth, both with the same noise-floor behaviour and the same concentration of residual signal on the main channels of large basins. Across the three variables, the field-mean relative difference remains below  $10^{-3}\%$ . Figure 9 reproduces the same comparison under ERA5-Land runoff. The residual magnitude and spatial pattern remain essentially unchanged between Figures 8 and 9, although the two forcing products differ in resolution and temporal variability. This consistency indicates that the residuals arise from the floating-point ordering of the routing calculation rather than from the runoff forcing itself.

Figures 10 and 11 compare simulated discharge for the final four years of the full simulation at six GRDC gauge locations spanning four orders of magnitude in drainage area. At every gauge location, the CPU and GPU curves overlay each other almost exactly, and the right-hand red axis shows the day-by-day CPU–GPU difference at a magnified scale. The residual amplitude follows the depth of the upstream reduction at the station location rather than the absolute discharge magnitude. On the large main stems, GPU `atomic_add` operations are associative and commutative but their execution order is not deterministic, whereas the CPU reduction follows a deterministic order. The two reductions therefore return slightly different floating-point bit patterns, producing a small bounded difference at the  $\text{m}^3/\text{s}$  level, three to four orders of magnitude smaller than the simulated discharge. At the mid-scale tributary and headwater gauge locations, the reduction is shallower and the red difference curve collapses toward zero for most of the displayed period. Figure 11 reproduces the same behaviour under ERA5-Land runoff, and neither forcing shows a monotonic component in the residual over the multi-year window. We therefore do not see evidence of numerical drift accumulating through the integration.

Mass conservation on the irregular unit-catchment graph is preserved by construction. The GPU implementation applies the same source-to-target routing fluxes as the CPU algorithm: main-channel fluxes are accumulated through `scatter_add` reductions, and bifurcation fluxes are accumulated through `atomic_add` reductions rather than overwriting destination storage. Each outgoing flux is therefore added to the corresponding downstream storage term, with the CPU–GPU difference limited to the floating-point summation order discussed above. The bifurcation-enabled configuration exercises both the base routing operations and the bifurcation-specific `atomic_add` path. The no-bifurcation configuration is a strict subset of these operations, so agreement with bifurcation enabled also supports agreement for the simpler routing case.

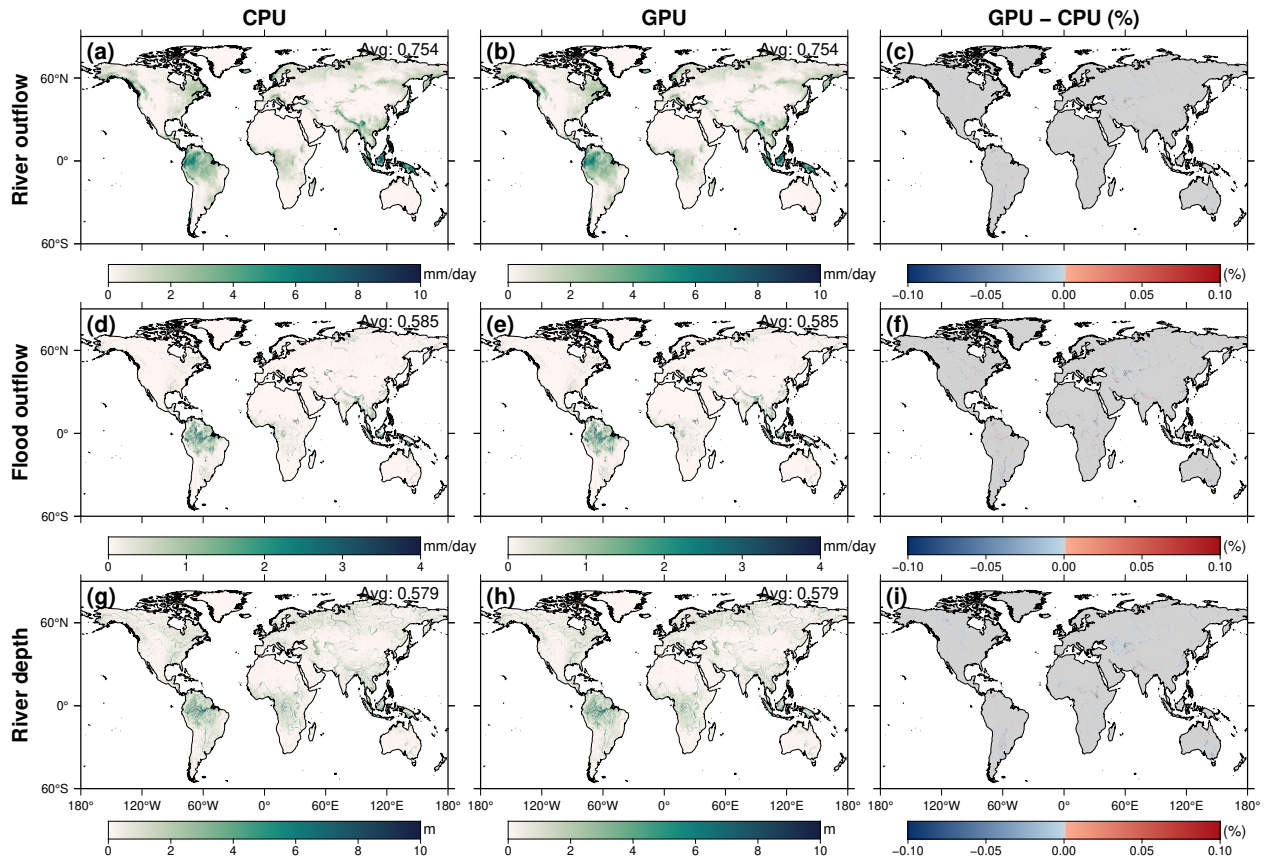

Figure 8. CPU vs. GPU mean fields with the bifurcation module enabled, under E2O Tier-1 ensemble-mean runoff at  $0.25^\circ$  for 1980–2014. (a–c) Mean river outflow for CPU, GPU and their relative difference. (d–f) Mean floodplain outflow for CPU, GPU and their relative difference. (g–i) Mean river depth for CPU, GPU and their relative difference. The third-column colour bar is bipolar with a flat gray band at  $\pm 0.001\%$  to mark the floating-point noise floor.

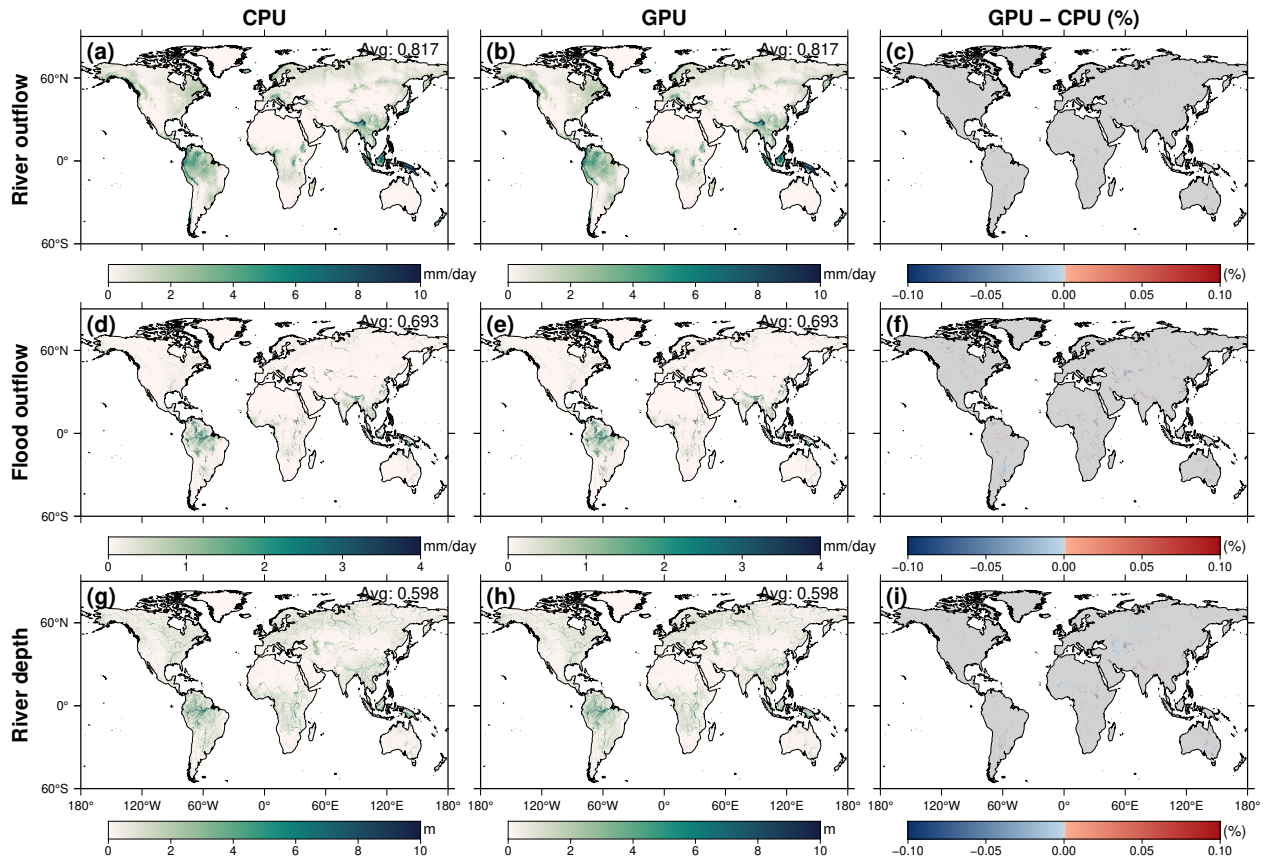

Figure 9. Same as Figure 8, but with ERA5-Land surface runoff at 0.1 °.

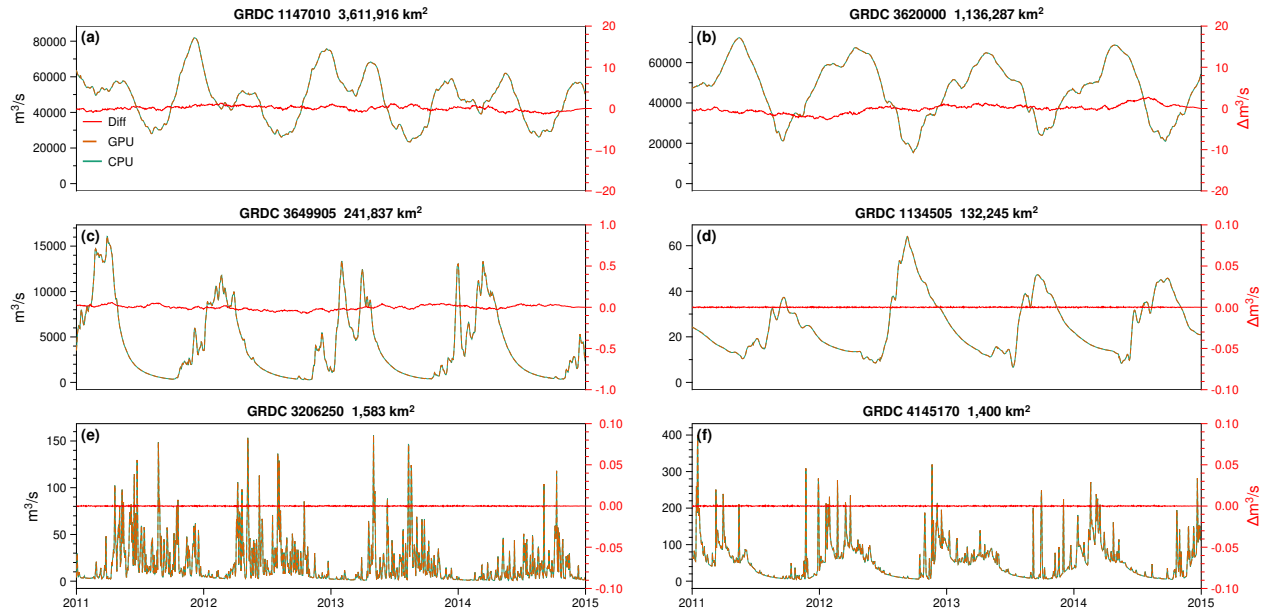

Figure 10. Simulated daily river discharge at the locations of six GRDC gauges spanning four orders of magnitude in drainage area, for the last four years of the 1980–2014 simulation under E2O Tier-1 runoff at  $0.25^\circ$ . The gauge panels are ordered by drainage area from large to small. CPU (green solid) and GPU (orange dashed) curves overlap; the difference is plotted as a red solid line with values given on the right-hand axis.

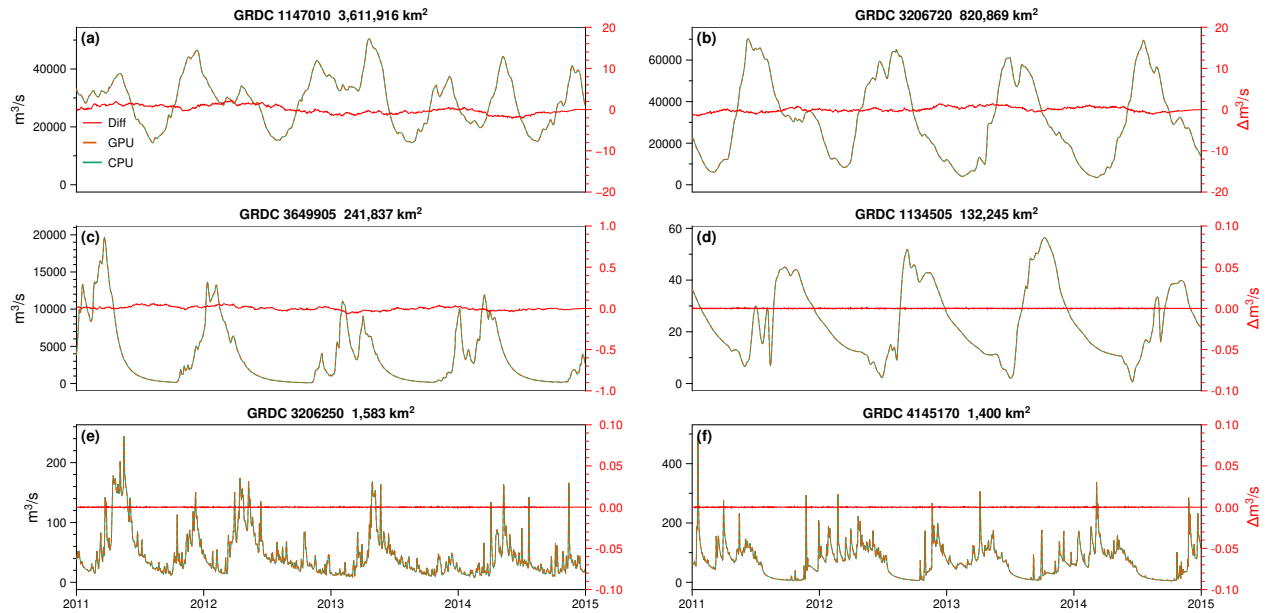

Figure 11. Same as Figure 10, but with ERA5-Land surface runoff at  $0.1^\circ$ .

**Comment 5.** Finally, I suggest expanding the Conclusions, which read more like an extended abstract. Specifically, the discussion is now limited to Line 353-356 and could be extended. For example how can the “model modularity” support the integration of reservoir operations and sediment

transport? This should ideally relate to existing / past efforts by the CaMa-Flood community, since model extensions integrating reservoirs already exist.

**To reviewer:** Thank you for the suggestion. We agree that the submitted Conclusions read too much like a summary and did not make the implications of modularity concrete enough. We therefore expanded the discussion to explain what a new process module would look like in CaMa-Flood-GPU: it declares its own per-unit-catchment state, registers an update kernel and contributes fluxes back through the same routing reduction used by the core solver.

This lets us relate the GPU framework to existing CaMa-Flood community developments rather than describing modularity abstractly. Reservoir operation schemes and sediment-transport extensions can be interpreted as additional catchment-level states and update kernels, which makes them natural candidates for the sub-module interface. We also made the differentiable-routing direction more specific by connecting the PyTorch/Triton design to gradient-based calibration and coupling with PyTorch-native land-surface or AI components. The manuscript change is shown below for the Conclusions, expanding the discussion previously limited to Lines 353-356.

**Revised manuscript text:**

Looking ahead, there are several avenues for further development. First, additional physics and processes could be incorporated. CaMa-Flood-GPU realizes this through a sub-module layer in which each physical process is encapsulated as a self-contained component. A component declares its own per-unit-catchment state fields, registers one update kernel called once per time step by the main integrator, and contributes any fluxes back to the channel network through the same `scatter_add` reduction used by the core routing. New processes are therefore added by writing one such sub-module rather than by modifying the existing flood-routing kernels or the time-step loop. For reservoir operation, the CaMa-Flood community has already developed schemes such as the global flood-control reservoir module of Hanazaki et al. (2022) and the H08-CaMa-Flood coupling of Shin et al. (2020). These schemes both express reservoir storage and release as per-time-step updates at the unit-catchment level, which maps directly onto this interface. Sediment transport schemes such as the global sediment-dynamics model of Hatono & Yoshimura (2020) similarly reduce, on the GPU side, to a small number of additional catchment-level state fields and one update kernel. These extensions can therefore be ported into the GPU framework as optional modules without rewriting the existing code. Second, a natural research direction for CaMa-Flood-GPU is end-to-end differentiable global routing. The integrator is built in PyTorch and uses custom Triton kernels for the core routing solver: the PyTorch layer already provides automatic differentiation for everything expressed as standard tensor operations, and the Triton kernels can be paired with hand-written backward kernels in the same way as in the wider PyTorch-Triton ecosystem. Once that pairing is in place, parameters such as Manning roughness, river width, floodplain elevation profile and even reservoir operating rules can be calibrated by gradient descent against discharge or altimetry observations, or trained jointly with PyTorch-based land-surface or AI components, in line with the differentiable-geoscience programme advocated by Shen et al. (2023). As part of our commitment to community engagement, we will provide thorough documentation and example cases to encourage broader adoption.

**Comment 6.** Line 22-23: I would provide more details on “certain terms” as not all GMD readers may be familiar with hydrodynamic modeling.

**To reviewer:** Thank you for pointing this out. We rephrased the opening hydrodynamic-model description so the local inertial approximation and sub-grid inundation are defined directly. The manuscript change is shown below for the Introduction, replacing the sentence around Lines 22-23.

**Revised manuscript text:**

However, applying such 2D models to large river basins is computationally prohibitive for many applications. To improve efficiency, simplified models such as LISFLOOD-FP adopt the local inertial formulation, which neglects the convective-acceleration term in the shallow-water momentum equation while retaining gravity and bed-friction terms; this preserves the propagation of flood waves at a fraction of the cost of the full Saint-Venant equations (Bates et al., 2010; de Almeida et al., 2012; Neal et al., 2021). A further-scalable alternative is the sub-grid inundation approach: instead of solving the 2D shallow-water equations explicitly, the inundated area and depth within each computational unit are diagnosed from a pre-computed sub-grid topographic profile, given the unit’s total water storage (Yamazaki, 2025). The Catchment-based Macro-scale Floodplain model (CaMa-Flood) is a leading example of this approach, enabling efficient yet physically-based global flood simulations (Yamazaki et al., 2011).

**Comment 7.** Line 23-24: Same comment as above.

**To reviewer:** This point is addressed together with the previous comment by the same revised Introduction passage. The manuscript change is shown below for the Introduction and is the same revised passage used to address Lines 22-23.

**Comment 8.** Line 25: Can you provide evidence of the “widespread adoption and balanced fidelity and efficiency” of CaMa-Flood?

**To reviewer:** Thank you for catching this. We reworded the sentence to remove unsupported adjectives and added benchmark references directly at the claim. The manuscript change is shown below for the Introduction, replacing the sentence around Line 25.

**Revised manuscript text:**

CaMa-Flood introduced a novel vectorized unit-catchment discretization of the river network, a departure from traditional uniform grids (Yamazaki et al., 2013). Among available global routing models, CaMa-Flood provides an established catchment-based representation of channel storage, floodplain storage and river-network routing. We selected CaMa-Flood as the baseline model for our GPU implementation; it has been adopted as the offline river-routing layer in land-surface and global hydrological models, with benchmark comparisons reporting measurable gains in discharge reproducibility relative to the native routing schemes (Zhao et al., 2017; Heinicke et al., 2024).

**Comment 9.** Line 66-76: Can you add a few references to support these statements?

**To reviewer:** Thank you. We added supporting references to the paragraph while keeping the narrative structure unchanged. The manuscript change is shown below for the Introduction, replacing the paragraph around Lines 66-76.

## Revised manuscript text:

Compared with regional two-dimensional (2D) flood models, which have already been successfully ported to GPUs (Morales-Hernández et al., 2021; Sharifian et al., 2023; Caviedes-Voullieme et al., 2023), global-scale river routing models such as CaMa-Flood have seen almost no GPU implementations to date. This likely stems from several intrinsic characteristics of large-scale hydrodynamic models that make GPU computation more challenging: (1) In 2D models, the connectivity between computational cells is uniform and limited to adjacent neighbors on a regular grid, whereas in global river models, the river network topology is defined by irregular upstream–downstream relationships that must be handled explicitly (Mizukami et al., 2016; Yamazaki et al., 2011). (2) In 2D models, the relationship between water storage and water level within each grid cell is generally linear or prescribed by a simple function, but global river models employ sub-grid floodplain topography, resulting in a nonlinear and spatially variable relationship (Yamazaki et al., 2011). (3) While 2D models use uniformly shaped grid cells as computational units, global river models discretize the land surface into irregular catchment-based units. This introduces interpolation across variable areas and greatly increases the total number of computational elements when performing high-resolution global simulations (Yamazaki et al., 2019), making efficient parallelization far more demanding.

**Comment 10.** Table 3: Is there a specific reason for choosing the Year 2000?

**To reviewer:** Thank you for the question. The benchmark period is calendar year 2000 (365 days, 2000-01-01 to 2000-12-31). Year 2000 was selected because it is included in the sample runoff forcing distributed with the CPU CaMa-Flood release, which makes the benchmark straightforward to reproduce. This is already stated in the new experimental-setup paragraph in Section 3.1 shown above.

## References

- Alvanos, M., and Christoudias, T. (2017). GPU-accelerated atmospheric chemical kinetics in the ECHAM/MESSy Earth system model (version 2.52). *Geoscientific Model Development*, 10, 3679-3693. <https://doi.org/10.5194/gmd-10-3679-2017>
- Bates, P. D., Horritt, M. S., and Fewtrell, T. J. (2010). A simple inertial formulation of the shallow water equations for efficient two-dimensional flood inundation modelling. *Journal of Hydrology*, 387, 33-45. <https://doi.org/10.1016/j.jhydrol.2010.03.027>
- Caviedes-Voullieme, D., et al. (2023). SERGHEI (SERGHEI-SWE) v1.0: a performance-portable high-performance parallel-computing shallow-water solver for hydrology and environmental hydraulics. *Geoscientific Model Development*, 16, 977-1008. <https://doi.org/10.5194/gmd-16-977-2023>
- de Almeida, G. A. M., Bates, P., Freer, J., and Souvignet, M. (2012). Improving the stability of a simple formulation of the shallow water equations for 2-D flood modeling. *Water Resources Research*, 48, W05528. <https://doi.org/10.1029/2011WR011570>
- Hanazaki, R., Yamazaki, D., and Yoshimura, K. (2022). Development of a reservoir flood control scheme for global flood models. *Journal of Advances in Modeling Earth Systems*, 14, e2021MS002944. <https://doi.org/10.1029/2021MS002944>

- Hatono, M., and Yoshimura, K. (2020). Development of a global sediment dynamics model. *Progress in Earth and Planetary Science*, 7, 59. <https://doi.org/10.1186/s40645-020-00368-6>
- Heinicke, S., et al. (2024). Global hydrological models continue to overestimate river discharge. *Environmental Research Letters*, 19, 074005. <https://doi.org/10.1088/1748-9326/ad52b0>
- Hokkanen, J., Kollet, S., Kraus, J., Herten, A., Hrywniak, M., and Pleiter, D. (2021). Leveraging HPC accelerator architectures with modern techniques: hydrologic modeling on GPUs with ParFlow. *Computational Geosciences*, 25, 1579-1590. <https://doi.org/10.1007/s10596-021-10051-4>
- Kim, H., Yeh, P. J.-F., Oki, T., and Kanae, S. (2009). Role of rivers in the seasonal variations of terrestrial water storage over global basins. *Geophysical Research Letters*, 36, L17402. <https://doi.org/10.1029/2009GL039006>
- Mateo, C. M. R., Yamazaki, D., Kim, H., Champathong, A., Vaze, J., and Oki, T. (2017). Impacts of spatial resolution and representation of flow connectivity on large-scale simulation of floods. *Hydrology and Earth System Sciences*, 21, 5143-5163. <https://doi.org/10.5194/hess-21-5143-2017>
- Mizukami, N., et al. (2016). mizuRoute version 1: a river network routing tool for continental-domain water resources applications. *Geoscientific Model Development*, 9, 2223-2238. <https://doi.org/10.5194/gmd-9-2223-2016>
- Morales-Hernández, M., et al. (2021). TRITON: A multi-GPU open source 2D hydrodynamic flood model. *Environmental Modelling and Software*, 141, 105034. <https://doi.org/10.1016/j.envsoft.2021.105034>
- Muñoz-Sabater, J., Dutra, E., Agusti-Panareda, A., Albergel, C., Arduini, G., et al. (2021). ERA5-Land: A state-of-the-art global reanalysis dataset for land applications. *Earth System Science Data*, 13, 4349-4383. <https://doi.org/10.5194/essd-13-4349-2021>
- Schellekens, J., Dutra, E., Martínez-de la Torre, A., Balsamo, G., van Dijk, A., Sperna Weiland, F., Minvielle, M., Calvet, J.-C., Decharme, B., Eisner, S., Fink, G., Flörke, M., Peßenteiner, S., van Beek, R., Polcher, J., Beck, H., Orth, R., Calton, B., Burke, S., Dorigo, W., and Weedon, G. P. (2017). A global water resources ensemble of hydrological models: the earth2Observe Tier-1 dataset. *Earth System Science Data*, 9, 389-413. <https://doi.org/10.5194/essd-9-389-2017>
- Neal, J., Hawker, L., Savage, J., Durand, M., Bates, P., and Sampson, C. (2021). Estimating river channel bathymetry in large-scale flood inundation models. *Water Resources Research*, 57, e2020WR028301. <https://doi.org/10.1029/2020WR028301>
- Rong, Y., Bates, P., and Neal, J. (2024). GPU-accelerated urban flood modeling using a nonuniform structured grid and a super grid scale river channel. *Water Resources Research*, 60, e2023WR036128. <https://doi.org/10.1029/2023WR036128>
- Sharifian, M. K., Kesserwani, G., Chowdhury, A. A., Neal, J., and Bates, P. (2023). LISFLOOD-FP 8.1: new GPU-accelerated solvers for faster fluvial/pluvial flood simulations. *Geoscientific Model Development*, 16, 2391-2413. <https://doi.org/10.5194/gmd-16-2391-2023>
- Shen, C., Appling, A. P., Gentine, P., et al. (2023). Differentiable modelling to unify machine learning and physical models for geosciences. *Nature Reviews Earth and Environment*, 4,

552-567. <https://doi.org/10.1038/s43017-023-00450-9>

- Shin, S., Pokhrel, Y., Yamazaki, D., Huang, X., Torbick, N., Qi, J., Pattanakiat, S., Ngo-Duc, T., and Nguyen, T. D. (2020). High resolution modeling of river-floodplain-reservoir inundation dynamics in the Mekong River Basin. *Water Resources Research*, 56, e2019WR026449. <https://doi.org/10.1029/2019WR026449>
- Yamazaki, D. (2025). Advancing global river hydrodynamics simulations by catchment-based macro-scale floodplain modeling approach. *Geoscience Letters*, 12, 72. <https://doi.org/10.1186/s40562-025-00452-z>
- Yamazaki, D., Kanae, S., Kim, H., and Oki, T. (2011). A physically based description of floodplain inundation dynamics in a global river routing model. *Water Resources Research*, 47, W04501. <https://doi.org/10.1029/2010WR009726>
- Yamazaki, D., de Almeida, G. A. M., and Bates, P. D. (2013). Improving computational efficiency in global river models by implementing the local inertial flow equation and a vector-based river network map. *Water Resources Research*, 49, 7221-7235. <https://doi.org/10.1002/wrcr.20552>
- Yamazaki, D., Sato, S., Kanae, S., Hirabayashi, Y., and Bates, P. D. (2014). Regional flood dynamics in a bifurcating mega delta simulated in a global river model. *Geophysical Research Letters*, 41, 3127-3135. <https://doi.org/10.1002/2014GL059744>
- Yamazaki, D., Ikeshima, D., Sosa, J., Bates, P. D., Allen, G. H., and Pavelsky, T. M. (2019). MERIT Hydro: A high-resolution global hydrography map based on latest topography dataset. *Water Resources Research*, 55, 5053-5073. <https://doi.org/10.1029/2019WR024873>
- Zahura, F. T., Goodall, J. L., Sadler, J. M., Shen, Y., Morsy, M. M., and Behl, M. (2020). Training machine learning surrogate models from a high-fidelity physics-based model: application for real-time street-scale flood prediction in an urban coastal community. *Water Resources Research*, 56, e2019WR027038. <https://doi.org/10.1029/2019WR027038>
- Zhao, F., Veldkamp, T. I. E., Frieler, K., Schewe, J., Ostberg, S., Willner, S., et al. (2017). The critical role of the routing scheme in simulating peak river discharge in global hydrological models. *Environmental Research Letters*, 12, 075003. <https://doi.org/10.1088/1748-9326/aa7250>
